# Supplementary material for: Microwave-Assisted Extraction/UHPLC-Q-Orbitrap-MS-Based Lipidomic Workflow for Comprehensive Study of Lipids in Soft Cheese
Source: MDPI journal article supplement (doi:10.3390/foods13071033), 2024-03-28
Supplement: s1 [file s1]

## **Supplementary Material**

### **Microwave-Assisted Extraction/UHPLC-Q-Orbitrap-MS-Based Lipidomic Workflow for Comprehensive Study of Lipids in Soft Cheese**

M. Campaniello, V. Nardelli, R. Zianni\*, M. Tomaiuolo, O. Miedico, M. Iammarino, A. Mentana

*Istituto Zooprofilattico Sperimentale della Puglia e della Basilicata, Via Manfredonia, 20-71121 Foggia, Italy*

**\* Corresponding author.**

E-mail address: [rosalia.zianni@izspb.it](mailto:rosalia.zianni@izspb.it)

**Table S1**

Operating chromatographic conditions, MS setting of UHPLC-Q-Orbitrap-MS system and Lipidsearch™ parameters.

| Operating chromatographic conditions                                                                                                                                                                                                                                                                                                     |                                                                                                                                                                                                                 |                                                                                                                                    |                                                                                                                                                                                                                                                                                                                       |                                                                                                                                                    |
|------------------------------------------------------------------------------------------------------------------------------------------------------------------------------------------------------------------------------------------------------------------------------------------------------------------------------------------|-----------------------------------------------------------------------------------------------------------------------------------------------------------------------------------------------------------------|------------------------------------------------------------------------------------------------------------------------------------|-----------------------------------------------------------------------------------------------------------------------------------------------------------------------------------------------------------------------------------------------------------------------------------------------------------------------|----------------------------------------------------------------------------------------------------------------------------------------------------|
| <b>Sample temperature:</b><br>18 °C                                                                                                                                                                                                                                                                                                      | <b>Column and security guard column:</b><br>Accucore C30 column (150 x 2.1 mm 2.6 µm column, Thermo) and ULTRA Cartridges UHPLC wide-pore C18 (AJ0-8769, 2 × 4.6 mm ID, with sub-2 m particles, Phenomenex)     | <b>Injection Volume:</b><br>2 µL (positive ion mode);<br>4 µL (negative ion mode)                                                  | <b>Phase A:</b><br>ACN/H <sub>2</sub> O (60:40, v/v),<br>10 mM NH <sub>4</sub> HCO <sub>2</sub> and 0.1% HCO <sub>2</sub> H<br><b>Phase B:</b><br>IPA/ACN (90:10, v/v),<br>10 mM NH <sub>4</sub> HCO <sub>2</sub> and 0.1% HCO <sub>2</sub> H<br>(Flow rate: 270 µL min <sup>-1</sup> )                               | <b>Elution gradient:</b><br><b>Time (min) / B (%):</b><br>0/25-4.0/43-4.1/55-<br>12.0/65-18.0/85-20.0/100-<br>26.0/100-26.5/30-28.0/25-<br>32.5/25 |
| MS setting                                                                                                                                                                                                                                                                                                                               |                                                                                                                                                                                                                 |                                                                                                                                    |                                                                                                                                                                                                                                                                                                                       |                                                                                                                                                    |
| <b>Scan range:</b><br>150-2000 m/z                                                                                                                                                                                                                                                                                                       | <b>Full scan resolution</b><br>(FWHM): 70,000<br><b>Multiple data-dependent (dd-MS<sup>2</sup>) scan resolution</b><br>(FWHM): 17,500                                                                           | <b>Spray voltage:</b><br>3.4 kV (positive ion mode); 3.3 kV (negative ion mode)                                                    | <b>Capillary temperature:</b> 290 °C<br><b>Auxiliary gas heater:</b> 290 °C                                                                                                                                                                                                                                           | <b>AGC Target:</b> 1e6<br><b>AGC target for dd-MS<sup>2</sup>:</b> 2e5                                                                             |
| Data processing<br>Lipidsearch™ software:                                                                                                                                                                                                                                                                                                |                                                                                                                                                                                                                 |                                                                                                                                    |                                                                                                                                                                                                                                                                                                                       |                                                                                                                                                    |
| <b>Search Parameters:</b><br><b>Class:</b> ALL Lipids<br><b>Ions:</b><br>+ H; +NH <sub>4</sub> ; +Na;<br>+(CH <sub>3</sub> CH <sub>2</sub> ) <sub>3</sub> NH;<br>+(CH <sub>3</sub> ) <sub>2</sub> NH <sub>2</sub> ; +H-H <sub>2</sub> O; +H-2H <sub>2</sub> O; +2H (+)<br><br>-H; +HCOO; +CH <sub>3</sub> COO; -2H; -CH <sub>3</sub> (-) | <b>Identification:</b><br>Precursor tolerance in ppm: 5.0 (+); 8.0 (-)<br>Product tolerance in ppm: 8.0 (+); 10.0 (-)<br>m-Score threshold: 5.0<br>Database: General; HCD; Oxid. GPL; labelled GPL, GL, SP, ChE | <b>Search Filters:</b><br>Top rank filter: on<br>Main node filter: all isomer peak<br>FA priority<br>ID quality filter: A, B, C, D | <b>Alignment Parameters:</b><br>Search Type: Product<br>Normalize type: None<br>Alignment method: Mean<br>R.T. Tolerance: 0.1<br>Calculate unassigned peak area: on<br>Top rank filter: on<br>Main node filter: Main isomer peak<br>m-score Threshold: 5.0<br>c-score Threshold: 2.0<br>ID Quality filter: A, B, C, D |                                                                                                                                                    |

**Table S2**

Deuterated lipids in QC samples

| <b>LipidMolec</b>    | <b>Calc Mass</b> | <b>BaseRt</b> | <b>Mean Peak Area</b> | <b>RSD %</b> |
|----------------------|------------------|---------------|-----------------------|--------------|
| Negative             |                  |               |                       |              |
| LPC(18:1D7)          | 528.3921         | 4.706         | 6.00E+07              | 1.157        |
| LPE(18:1D7)          | 486.3451         | 4.753         | 3.93E+07              | 2.560        |
| PC(18:1D7_15:0)      | 752.6061         | 14.112        | 3.37E+07              | 1.081        |
| PE(18:1D7_15:0)      | 710.5591         | 14.126        | 1.96E+07              | 3.954        |
| PG(18:1D7_15:0)      | 741.5537         | 12.667        | 7.00E+07              | 3.154        |
| PI(18:1D7_15:0)      | 829.5698         | 12.203        | 2.87E+07              | 6.067        |
| SM(d36:2D9)          | 737.6397         | 12.949        | 2.87E+07              | 5.446        |
| Positive             |                  |               |                       |              |
| Cer(m32:0)           | 495.5015         | 13.457        | 9.31E+07              | 2.820        |
| ChE(18:1D7)          | 657.6441         | 9.667         | 3.95E+08              | 15.959       |
| LPC(18:1D7)          | 528.3921         | 4.651         | 2.75E+08              | 3.193        |
| LPE(18:1D7)          | 486.3451         | 4.34          | 5.39E+07              | 2.542        |
| PC(33:1D7)           | 752.6061         | 14.105        | 3.99E+08              | 3.146        |
| PE(18:1D7_15:0)      | 710.5591         | 14.157        | 6.41E+07              | 3.476        |
| PG(18:1D7_15:0)      | 741.5537         | 12.672        | 8.75E+07              | 2.137        |
| PI(18:1D7_15:0)      | 829.5698         | 12.212        | 3.10E+07              | 4.054        |
| SM(d36:2D9)          | 737.6397         | 12.934        | 2.00E+08              | 6.039        |
| TG(15:0_18:1D7_15:0) | 811.7646         | 23.036        | 7.36E+07              | 3.334        |

**Table S3**

Details on the individual lipids identified

| <b>LipidMolec</b>  | <b>Calc Mass</b> | <b>MainIon</b>   |
|--------------------|------------------|------------------|
| TG(10:0_10:0_10:0) | 554.4546         | +NH <sub>4</sub> |
| TG(10:0_10:0_12:0) | 582.4859         | +NH <sub>4</sub> |
| TG(10:0_10:0_12:1) | 580.4703         | +NH <sub>4</sub> |
| TG(10:0_12:0_12:0) | 610.5172         | +NH <sub>4</sub> |
| TG(10:0_12:0_14:0) | 638.5485         | +NH <sub>4</sub> |
| TG(10:0_14:0_18:1) | 720.6268         | +NH <sub>4</sub> |
| TG(10:0_17:1_18:1) | 760.6581         | +NH <sub>4</sub> |
| TG(10:0_18:1_18:2) | 772.6581         | +NH <sub>4</sub> |
| TG(10:0_18:2_18:2) | 770.6424         | +NH <sub>4</sub> |
| TG(11:0_18:1_18:2) | 786.6737         | +NH <sub>4</sub> |
| TG(12:0_14:0_14:0) | 694.6111         | +NH <sub>4</sub> |
| TG(12:0_18:2_18:2) | 798.6737         | +NH <sub>4</sub> |
| TG(12:0_18:2_18:3) | 796.6581         | +NH <sub>4</sub> |
| TG(15:0_10:0_12:0) | 652.5642         | +NH <sub>4</sub> |
| TG(15:0_10:0_14:0) | 680.5955         | +NH <sub>4</sub> |
| TG(15:0_10:0_16:0) | 708.6268         | +NH <sub>4</sub> |
| TG(15:0_10:0_18:1) | 734.6424         | +NH <sub>4</sub> |
| TG(15:0_10:1_18:1) | 732.6268         | +NH <sub>4</sub> |
| TG(15:0_10:1_18:2) | 730.6111         | +NH <sub>4</sub> |
| TG(15:0_12:0_14:0) | 708.6268         | +NH <sub>4</sub> |
| TG(15:0_12:0_18:1) | 762.6737         | +Na              |
| TG(15:0_14:0_14:0) | 736.6581         | +NH <sub>4</sub> |
| TG(15:0_14:0_16:0) | 764.6894         | +NH <sub>4</sub> |
| TG(15:0_14:0_18:1) | 790.705          | +Na              |
| TG(15:0_14:1_18:1) | 788.6894         | +NH <sub>4</sub> |
| TG(15:0_16:0_16:0) | 792.7207         | +NH <sub>4</sub> |
| TG(15:0_16:0_18:1) | 818.7363         | +NH <sub>4</sub> |
| TG(15:0_16:0_18:2) | 816.7207         | +Na              |
| TG(15:0_16:0_20:4) | 840.7207         | +NH <sub>4</sub> |
| TG(15:0_18:1_18:1) | 844.752          | +NH <sub>4</sub> |
| TG(15:0_18:1_18:2) | 842.7363         | +NH <sub>4</sub> |
| TG(15:0_18:1_18:3) | 840.7207         | +NH <sub>4</sub> |
| TG(15:0_6:0_10:0)  | 568.4703         | +NH <sub>4</sub> |
| TG(15:0_6:0_14:0)  | 624.5329         | +NH <sub>4</sub> |
| TG(15:0_6:0_16:0)  | 652.5642         | +NH <sub>4</sub> |
| TG(15:0_6:0_16:1)  | 650.5485         | +NH <sub>4</sub> |
| TG(15:0_6:0_18:1)  | 678.5798         | +NH <sub>4</sub> |
| TG(15:0_6:0_8:0)   | 540.439          | +NH <sub>4</sub> |
| TG(15:0_8:0_14:0)  | 652.5642         | +NH <sub>4</sub> |
| TG(15:0_8:0_16:1)  | 678.5798         | +NH <sub>4</sub> |

|                    |          |                  |
|--------------------|----------|------------------|
| TG(16:0_10:0_14:0) | 694.6111 | +NH <sub>4</sub> |
| TG(16:0_10:0_17:1) | 734.6424 | +NH <sub>4</sub> |
| TG(16:0_10:1_18:3) | 742.6111 | +NH <sub>4</sub> |
| TG(16:0_12:0_14:0) | 722.6424 | +NH <sub>4</sub> |
| TG(16:0_12:0_20:4) | 798.6737 | +NH <sub>4</sub> |
| TG(16:0_14:0_14:0) | 750.6737 | +NH <sub>4</sub> |
| TG(16:0_14:0_16:0) | 778.705  | +NH <sub>4</sub> |
| TG(16:0_14:0_17:1) | 790.705  | +NH <sub>4</sub> |
| TG(16:0_14:0_18:1) | 804.7207 | +Na              |
| TG(16:0_14:0_20:4) | 826.705  | +NH <sub>4</sub> |
| TG(16:0_14:0_20:5) | 824.6894 | +NH <sub>4</sub> |
| TG(16:0_16:0_16:0) | 806.7363 | +NH <sub>4</sub> |
| TG(16:0_16:0_17:1) | 818.7363 | +NH <sub>4</sub> |
| TG(16:0_16:0_18:1) | 832.752  | +Na              |
| TG(16:0_16:0_20:5) | 852.7207 | +NH <sub>4</sub> |
| TG(16:0_16:1_18:1) | 830.7363 | +Na              |
| TG(16:0_16:1_20:5) | 850.705  | +NH <sub>4</sub> |
| TG(16:0_17:0_18:1) | 846.7676 | +Na              |
| TG(16:0_17:1_18:1) | 844.752  | +NH <sub>4</sub> |
| TG(16:0_17:1_18:2) | 842.7363 | +NH <sub>4</sub> |
| TG(16:0_18:1_18:1) | 858.7676 | +Na              |
| TG(16:0_18:1_20:5) | 878.7363 | +NH <sub>4</sub> |
| TG(16:0_18:1_21:0) | 902.8302 | +NH <sub>4</sub> |
| TG(16:0_18:1_22:0) | 916.8459 | +NH <sub>4</sub> |
| TG(16:0_18:1_23:0) | 930.8615 | +NH <sub>4</sub> |
| TG(16:0_18:1_23:1) | 928.8459 | +NH <sub>4</sub> |
| TG(16:0_18:1_24:0) | 944.8772 | +NH <sub>4</sub> |
| TG(16:0_18:1_24:1) | 942.8615 | +NH <sub>4</sub> |
| TG(16:0_18:2_18:2) | 854.7363 | +NH <sub>4</sub> |
| TG(16:0_6:0_10:0)  | 582.4859 | +NH <sub>4</sub> |
| TG(16:0_6:0_14:0)  | 638.5485 | +NH <sub>4</sub> |
| TG(16:0_6:0_16:0)  | 666.5798 | +NH <sub>4</sub> |
| TG(16:0_6:0_17:0)  | 680.5955 | +NH <sub>4</sub> |
| TG(16:0_6:0_18:1)  | 692.5955 | +NH <sub>4</sub> |
| TG(16:0_6:0_20:4)  | 714.5798 | +NH <sub>4</sub> |
| TG(16:0_6:0_6:0)   | 526.4233 | +NH <sub>4</sub> |
| TG(16:0_8:0_10:0)  | 610.5172 | +NH <sub>4</sub> |
| TG(16:1_10:0_12:0) | 664.5642 | +NH <sub>4</sub> |
| TG(16:1_10:0_18:1) | 746.6424 | +NH <sub>4</sub> |
| TG(16:1_12:0_18:1) | 774.6737 | +NH <sub>4</sub> |
| TG(16:1_14:1_18:1) | 800.6894 | +NH <sub>4</sub> |
| TG(16:1_18:1_18:1) | 856.752  | +NH <sub>4</sub> |
| TG(16:1_18:1_18:2) | 854.7363 | +NH <sub>4</sub> |
| TG(16:1_18:1_18:3) | 852.7207 | +NH <sub>4</sub> |
| TG(16:1_18:2_18:2) | 852.7207 | +NH <sub>4</sub> |

|                    |          |                  |
|--------------------|----------|------------------|
| TG(16:1_18:2_18:3) | 850.705  | +NH <sub>4</sub> |
| TG(16:1_6:0_18:1)  | 690.5798 | +NH <sub>4</sub> |
| TG(16:1_6:0_18:2)  | 688.5642 | +NH <sub>4</sub> |
| TG(16:1_6:0_18:3)  | 686.5485 | +NH <sub>4</sub> |
| TG(16:1_6:0_6:0)   | 524.4077 | +NH <sub>4</sub> |
| TG(16:1_8:0_18:2)  | 716.5955 | +NH <sub>4</sub> |
| TG(17:0_18:1_18:1) | 872.7833 | +NH <sub>4</sub> |
| TG(17:0_18:1_18:2) | 870.7676 | +NH <sub>4</sub> |
| TG(17:0_18:1_18:3) | 868.752  | +NH <sub>4</sub> |
| TG(17:0_6:0_18:1)  | 706.6111 | +NH <sub>4</sub> |
| TG(18:0_15:0_16:0) | 820.752  | +NH <sub>4</sub> |
| TG(18:0_16:0_16:0) | 834.7676 | +NH <sub>4</sub> |
| TG(18:0_16:0_17:0) | 848.7833 | +NH <sub>4</sub> |
| TG(18:0_16:0_17:1) | 846.7676 | +NH <sub>4</sub> |
| TG(18:0_16:0_18:0) | 862.7989 | +Na              |
| TG(18:0_16:0_18:1) | 860.7833 | +NH <sub>4</sub> |
| TG(18:0_16:0_20:0) | 890.8302 | +NH <sub>4</sub> |
| TG(18:0_16:0_21:0) | 904.8459 | +NH <sub>4</sub> |
| TG(18:0_16:0_22:0) | 918.8615 | +NH <sub>4</sub> |
| TG(18:0_16:0_23:0) | 932.8772 | +NH <sub>4</sub> |
| TG(18:0_16:0_24:0) | 946.8928 | +NH <sub>4</sub> |
| TG(18:0_17:0_18:0) | 876.8146 | +NH <sub>4</sub> |
| TG(18:0_17:0_18:1) | 874.7989 | +NH <sub>4</sub> |
| TG(18:0_17:1_18:0) | 874.7989 | +NH <sub>4</sub> |
| TG(18:0_17:1_18:1) | 872.7833 | +NH <sub>4</sub> |
| TG(18:0_17:1_18:2) | 870.7676 | +NH <sub>4</sub> |
| TG(18:0_18:0_18:0) | 890.8302 | +NH <sub>4</sub> |
| TG(18:0_18:0_18:1) | 888.8146 | +NH <sub>4</sub> |
| TG(18:0_18:0_19:0) | 904.8459 | +NH <sub>4</sub> |
| TG(18:0_18:0_20:0) | 918.8615 | +NH <sub>4</sub> |
| TG(18:0_18:0_21:0) | 932.8772 | +NH <sub>4</sub> |
| TG(18:0_18:0_22:1) | 944.8772 | +NH <sub>4</sub> |
| TG(18:0_18:0_22:4) | 938.8302 | +NH <sub>4</sub> |
| TG(18:0_18:0_23:0) | 960.9085 | +NH <sub>4</sub> |
| TG(18:0_18:1_18:1) | 886.7989 | +NH <sub>4</sub> |
| TG(18:0_18:1_19:0) | 902.8302 | +NH <sub>4</sub> |
| TG(18:0_18:1_20:0) | 916.8459 | +NH <sub>4</sub> |
| TG(18:0_18:1_20:1) | 914.8302 | +NH <sub>4</sub> |
| TG(18:0_18:1_22:4) | 936.8146 | +NH <sub>4</sub> |
| TG(18:0_18:1_22:5) | 934.7989 | +NH <sub>4</sub> |
| TG(18:0_18:1_23:0) | 958.8928 | +NH <sub>4</sub> |
| TG(18:0_18:1_23:1) | 956.8772 | +NH <sub>4</sub> |
| TG(18:0_18:1_24:0) | 972.9085 | +NH <sub>4</sub> |
| TG(18:0_18:1_24:1) | 970.8928 | +NH <sub>4</sub> |
| TG(18:0_20:0_23:1) | 986.9241 | +NH <sub>4</sub> |

|                    |          |                  |
|--------------------|----------|------------------|
| TG(18:0_6:0_16:0)  | 694.6111 | +NH <sub>4</sub> |
| TG(18:0_6:0_18:0)  | 722.6424 | +NH <sub>4</sub> |
| TG(18:0_6:0_18:1)  | 720.6268 | +NH <sub>4</sub> |
| TG(18:0_6:0_18:3)  | 716.5955 | +NH <sub>4</sub> |
| TG(18:1_10:1_18:3) | 768.6268 | +NH <sub>4</sub> |
| TG(18:1_12:0_14:0) | 748.6581 | +NH <sub>4</sub> |
| TG(18:1_12:0_17:1) | 788.6894 | +NH <sub>4</sub> |
| TG(18:1_12:0_18:1) | 802.705  | +NH <sub>4</sub> |
| TG(18:1_14:0_14:0) | 776.6894 | +NH <sub>4</sub> |
| TG(18:1_14:0_17:1) | 816.7207 | +NH <sub>4</sub> |
| TG(18:1_14:0_18:1) | 830.7363 | +Na              |
| TG(18:1_14:1_17:1) | 814.705  | +NH <sub>4</sub> |
| TG(18:1_14:1_18:1) | 828.7207 | +NH <sub>4</sub> |
| TG(18:1_14:1_18:2) | 826.705  | +NH <sub>4</sub> |
| TG(18:1_14:1_18:3) | 824.6894 | +NH <sub>4</sub> |
| TG(18:1_17:1_18:1) | 870.7676 | +NH <sub>4</sub> |
| TG(18:1_17:1_18:2) | 868.752  | +NH <sub>4</sub> |
| TG(18:1_18:1_18:1) | 884.7833 | +NH <sub>4</sub> |
| TG(18:1_18:1_18:2) | 882.7676 | +NH <sub>4</sub> |
| TG(18:1_18:1_20:3) | 908.7833 | +NH <sub>4</sub> |
| TG(18:1_18:1_21:0) | 928.8459 | +NH <sub>4</sub> |
| TG(18:1_18:1_21:1) | 926.8302 | +NH <sub>4</sub> |
| TG(18:1_18:1_22:1) | 940.8459 | +NH <sub>4</sub> |
| TG(18:1_18:1_22:5) | 932.7833 | +NH <sub>4</sub> |
| TG(18:1_18:1_23:1) | 954.8615 | +NH <sub>4</sub> |
| TG(18:1_18:1_24:1) | 968.8772 | +NH <sub>4</sub> |
| TG(18:1_18:2_18:2) | 880.752  | +NH <sub>4</sub> |
| TG(18:1_18:2_18:3) | 878.7363 | +NH <sub>4</sub> |
| TG(18:1_18:2_20:3) | 906.7676 | +NH <sub>4</sub> |
| TG(18:1_18:2_20:4) | 904.752  | +NH <sub>4</sub> |
| TG(19:0_18:1_18:1) | 900.8146 | +NH <sub>4</sub> |
| TG(19:0_18:1_18:2) | 898.7989 | +NH <sub>4</sub> |
| TG(19:1_18:0_18:0) | 902.8302 | +NH <sub>4</sub> |
| TG(19:1_18:0_18:1) | 900.8146 | +NH <sub>4</sub> |
| TG(19:1_18:1_18:1) | 898.7989 | +NH <sub>4</sub> |
| TG(19:1_18:1_18:2) | 896.7833 | +NH <sub>4</sub> |
| TG(20:0_16:0_17:0) | 876.8146 | +NH <sub>4</sub> |
| TG(20:0_16:0_18:1) | 888.8146 | +NH <sub>4</sub> |
| TG(20:0_18:1_18:2) | 912.8146 | +NH <sub>4</sub> |
| TG(20:1_18:1_18:1) | 912.8146 | +NH <sub>4</sub> |
| TG(20:1_18:1_18:2) | 910.7989 | +NH <sub>4</sub> |
| TG(25:0_16:0_18:0) | 960.9085 | +NH <sub>4</sub> |
| TG(25:0_16:0_18:1) | 958.8928 | +NH <sub>4</sub> |
| TG(25:0_18:0_18:1) | 986.9241 | +NH <sub>4</sub> |
| TG(25:0_18:1_18:1) | 984.9085 | +NH <sub>4</sub> |

|                    |           |                  |
|--------------------|-----------|------------------|
| TG(25:1_16:0_16:0) | 930.8615  | +NH <sub>4</sub> |
| TG(25:1_16:0_18:1) | 956.8772  | +NH <sub>4</sub> |
| TG(26:0_16:0_18:0) | 974.9241  | +NH <sub>4</sub> |
| TG(26:0_18:0_18:1) | 1000.9398 | +NH <sub>4</sub> |
| TG(26:0_18:1_18:1) | 998.9241  | +NH <sub>4</sub> |
| TG(26:0_18:1_18:2) | 996.9085  | +NH <sub>4</sub> |
| TG(4:0_10:0_10:0)  | 470.3607  | +NH <sub>4</sub> |
| TG(4:0_10:0_11:0)  | 484.3764  | +NH <sub>4</sub> |
| TG(4:0_10:0_12:0)  | 498.392   | +Na              |
| TG(4:0_10:0_16:0)  | 554.4546  | +NH <sub>4</sub> |
| TG(4:0_10:0_18:0)  | 582.4859  | +NH <sub>4</sub> |
| TG(4:0_10:0_20:4)  | 602.4546  | +NH <sub>4</sub> |
| TG(4:0_10:1_12:1)  | 494.3607  | +NH <sub>4</sub> |
| TG(4:0_10:1_15:0)  | 538.4233  | +NH <sub>4</sub> |
| TG(4:0_10:1_16:0)  | 552.439   | +NH <sub>4</sub> |
| TG(4:0_10:1_18:0)  | 580.4703  | +NH <sub>4</sub> |
| TG(4:0_10:1_18:1)  | 578.4546  | +NH <sub>4</sub> |
| TG(4:0_10:1_18:2)  | 576.439   | +NH <sub>4</sub> |
| TG(4:0_10:1_18:3)  | 574.4233  | +NH <sub>4</sub> |
| TG(4:0_11:0_18:2)  | 592.4703  | +NH <sub>4</sub> |
| TG(4:0_11:1_14:1)  | 536.4077  | +NH <sub>4</sub> |
| TG(4:0_11:1_16:0)  | 566.4546  | +NH <sub>4</sub> |
| TG(4:0_12:0_18:3)  | 604.4703  | +NH <sub>4</sub> |
| TG(4:0_12:0_20:4)  | 630.4859  | +NH <sub>4</sub> |
| TG(4:0_12:1_18:1)  | 606.4859  | +NH <sub>4</sub> |
| TG(4:0_12:2_16:0)  | 578.4546  | +NH <sub>4</sub> |
| TG(4:0_13:0_18:2)  | 620.5016  | +NH <sub>4</sub> |
| TG(4:0_14:0_14:0)  | 582.4859  | +NH <sub>4</sub> |
| TG(4:0_14:0_15:0)  | 596.5016  | +NH <sub>4</sub> |
| TG(4:0_14:0_16:0)  | 610.5172  | +NH <sub>4</sub> |
| TG(4:0_14:0_18:1)  | 636.5329  | +NH <sub>4</sub> |
| TG(4:0_14:0_18:2)  | 634.5172  | +NH <sub>4</sub> |
| TG(4:0_14:0_18:3)  | 632.5016  | +NH <sub>4</sub> |
| TG(4:0_14:0_20:4)  | 658.5172  | +NH <sub>4</sub> |
| TG(4:0_14:0_22:5)  | 684.5329  | +NH <sub>4</sub> |
| TG(4:0_14:1_18:3)  | 630.4859  | +NH <sub>4</sub> |
| TG(4:0_14:3_16:0)  | 604.4703  | +NH <sub>4</sub> |
| TG(4:0_15:0_16:0)  | 624.5329  | +NH <sub>4</sub> |
| TG(4:0_15:0_16:1)  | 622.5172  | +NH <sub>4</sub> |
| TG(4:0_15:0_18:1)  | 650.5485  | +NH <sub>4</sub> |
| TG(4:0_15:0_18:2)  | 648.5329  | +NH <sub>4</sub> |
| TG(4:0_15:0_18:3)  | 646.5172  | +NH <sub>4</sub> |
| TG(4:0_16:0_16:0)  | 638.5485  | +NH <sub>4</sub> |
| TG(4:0_16:0_16:1)  | 636.5329  | +NH <sub>4</sub> |
| TG(4:0_16:0_17:0)  | 652.5642  | +NH <sub>4</sub> |



|                   |          |                  |
|-------------------|----------|------------------|
| TG(4:0_16:0_17:1) | 650.5485 | +NH <sub>4</sub> |
| TG(4:0_16:0_18:0) | 666.5798 | +NH <sub>4</sub> |
| TG(4:0_16:0_18:2) | 662.5485 | +NH <sub>4</sub> |
| TG(4:0_16:0_18:3) | 660.5329 | +NH <sub>4</sub> |
| TG(4:0_16:0_19:1) | 678.5798 | +NH <sub>4</sub> |
| TG(4:0_16:0_20:4) | 686.5485 | +NH <sub>4</sub> |
| TG(4:0_16:0_20:5) | 684.5329 | +NH <sub>4</sub> |
| TG(4:0_16:1_18:3) | 658.5172 | +NH <sub>4</sub> |
| TG(4:0_17:0_18:0) | 680.5955 | +NH <sub>4</sub> |
| TG(4:0_17:0_18:1) | 678.5798 | +NH <sub>4</sub> |
| TG(4:0_17:0_18:2) | 676.5642 | +NH <sub>4</sub> |
| TG(4:0_17:1_18:0) | 678.5798 | +NH <sub>4</sub> |
| TG(4:0_17:1_18:1) | 676.5642 | +NH <sub>4</sub> |
| TG(4:0_17:1_18:2) | 674.5485 | +NH <sub>4</sub> |
| TG(4:0_18:0_18:0) | 694.6111 | +NH <sub>4</sub> |
| TG(4:0_18:0_18:1) | 692.5955 | +NH <sub>4</sub> |
| TG(4:0_18:0_18:3) | 688.5642 | +NH <sub>4</sub> |
| TG(4:0_18:1_18:1) | 690.5798 | +NH <sub>4</sub> |
| TG(4:0_18:1_18:2) | 688.5642 | +NH <sub>4</sub> |
| TG(4:0_18:1_19:1) | 704.5955 | +NH <sub>4</sub> |
| TG(4:0_18:1_20:4) | 712.5642 | +NH <sub>4</sub> |
| TG(4:0_18:1_20:5) | 710.5485 | +NH <sub>4</sub> |
| TG(4:0_18:2_18:2) | 686.5485 | +NH <sub>4</sub> |
| TG(4:0_18:2_18:3) | 684.5329 | +NH <sub>4</sub> |
| TG(4:0_6:0_10:0)  | 414.2981 | +NH <sub>4</sub> |
| TG(4:0_6:0_12:0)  | 442.3294 | +NH <sub>4</sub> |
| TG(4:0_6:0_13:0)  | 456.3451 | +NH <sub>4</sub> |
| TG(4:0_6:0_14:0)  | 470.3607 | +NH <sub>4</sub> |
| TG(4:0_6:0_14:1)  | 468.3451 | +Na              |
| TG(4:0_6:0_15:0)  | 484.3764 | +NH <sub>4</sub> |
| TG(4:0_6:0_16:0)  | 498.392  | +Na              |
| TG(4:0_6:0_16:1)  | 496.3764 | +Na              |
| TG(4:0_6:0_17:1)  | 510.392  | +NH <sub>4</sub> |
| TG(4:0_6:0_18:0)  | 526.4233 | +NH <sub>4</sub> |
| TG(4:0_6:0_18:1)  | 524.4077 | +NH <sub>4</sub> |
| TG(4:0_6:0_18:2)  | 522.392  | +NH <sub>4</sub> |
| TG(4:0_6:0_18:3)  | 520.3764 | +NH <sub>4</sub> |
| TG(4:0_6:0_20:4)  | 546.392  | +NH <sub>4</sub> |
| TG(4:0_8:0_12:0)  | 470.3607 | +NH <sub>4</sub> |
| TG(4:0_8:0_12:1)  | 468.3451 | +NH <sub>4</sub> |
| TG(4:0_8:0_14:0)  | 498.392  | +Na              |
| TG(4:0_8:0_14:2)  | 494.3607 | +NH <sub>4</sub> |
| TG(4:0_8:0_16:0)  | 526.4233 | +NH <sub>4</sub> |
| TG(4:0_8:0_17:1)  | 538.4233 | +NH <sub>4</sub> |
| TG(4:0_8:0_18:1)  | 552.439  | +NH <sub>4</sub> |

|                   |          |                  |
|-------------------|----------|------------------|
| TG(4:0_8:0_20:4)  | 574.4233 | +NH <sub>4</sub> |
| TG(4:0_9:0_14:1)  | 510.392  | +NH <sub>4</sub> |
| TG(4:0_9:0_18:1)  | 566.4546 | +NH <sub>4</sub> |
| TG(4:0_9:0_18:2)  | 564.439  | +NH <sub>4</sub> |
| TG(6:0_10:0_10:1) | 496.3764 | +NH <sub>4</sub> |
| TG(6:0_10:0_12:0) | 526.4233 | +NH <sub>4</sub> |
| TG(6:0_10:0_14:0) | 554.4546 | +NH <sub>4</sub> |
| TG(6:0_10:0_14:1) | 552.439  | +NH <sub>4</sub> |
| TG(6:0_10:0_17:1) | 594.4859 | +NH <sub>4</sub> |
| TG(6:0_10:0_18:1) | 608.5016 | +NH <sub>4</sub> |
| TG(6:0_10:0_18:2) | 606.4859 | +NH <sub>4</sub> |
| TG(6:0_10:0_18:3) | 604.4703 | +NH <sub>4</sub> |
| TG(6:0_10:0_20:4) | 630.4859 | +NH <sub>4</sub> |
| TG(6:0_12:0_14:0) | 582.4859 | +NH <sub>4</sub> |
| TG(6:0_12:0_20:4) | 658.5172 | +NH <sub>4</sub> |
| TG(6:0_14:0_14:0) | 610.5172 | +NH <sub>4</sub> |
| TG(6:0_14:0_18:1) | 664.5642 | +NH <sub>4</sub> |
| TG(6:0_14:0_18:2) | 662.5485 | +NH <sub>4</sub> |
| TG(6:0_14:1_17:1) | 648.5329 | +NH <sub>4</sub> |
| TG(6:0_14:1_18:1) | 662.5485 | +NH <sub>4</sub> |
| TG(6:0_14:1_18:2) | 660.5329 | +NH <sub>4</sub> |
| TG(6:0_14:1_18:3) | 658.5172 | +NH <sub>4</sub> |
| TG(6:0_17:1_18:1) | 704.5955 | +NH <sub>4</sub> |
| TG(6:0_17:1_18:2) | 702.5798 | +NH <sub>4</sub> |
| TG(6:0_18:1_18:1) | 718.6111 | +NH <sub>4</sub> |
| TG(6:0_18:1_18:2) | 716.5955 | +NH <sub>4</sub> |
| TG(6:0_18:1_20:4) | 740.5955 | +NH <sub>4</sub> |
| TG(6:0_18:1_20:5) | 738.5798 | +NH <sub>4</sub> |
| TG(6:0_18:2_18:2) | 714.5798 | +NH <sub>4</sub> |
| TG(6:0_18:2_18:3) | 712.5642 | +NH <sub>4</sub> |
| TG(6:0_6:0_10:0)  | 442.3294 | +NH <sub>4</sub> |
| TG(6:0_6:0_12:0)  | 470.3607 | +NH <sub>4</sub> |
| TG(6:0_6:0_14:0)  | 498.392  | +NH <sub>4</sub> |
| TG(6:0_6:0_18:2)  | 550.4233 | +NH <sub>4</sub> |
| TG(6:0_6:0_18:3)  | 548.4077 | +NH <sub>4</sub> |
| TG(6:0_8:0_10:0)  | 470.3607 | +NH <sub>4</sub> |
| TG(6:0_8:0_10:1)  | 468.3451 | +NH <sub>4</sub> |
| TG(6:0_8:0_12:0)  | 498.392  | +Na              |
| TG(6:0_8:0_12:1)  | 496.3764 | +NH <sub>4</sub> |
| TG(6:0_8:0_14:0)  | 526.4233 | +NH <sub>4</sub> |
| TG(6:0_8:0_14:1)  | 524.4077 | +NH <sub>4</sub> |
| TG(6:0_8:0_17:1)  | 566.4546 | +NH <sub>4</sub> |
| TG(6:0_8:0_18:1)  | 580.4703 | +NH <sub>4</sub> |
| TG(6:0_8:0_18:2)  | 578.4546 | +NH <sub>4</sub> |
| TG(6:0_8:0_18:3)  | 576.439  | +NH <sub>4</sub> |

|                       |          |                  |
|-----------------------|----------|------------------|
| TG(6:0_8:0_20:4)      | 602.4546 | +NH <sub>4</sub> |
| TG(6:0_9:0_12:0)      | 512.4077 | +NH <sub>4</sub> |
| TG(8:0_10:0_10:0)     | 526.4233 | +NH <sub>4</sub> |
| TG(8:0_10:0_18:1)     | 636.5329 | +NH <sub>4</sub> |
| TG(8:0_10:0_18:2)     | 634.5172 | +NH <sub>4</sub> |
| TG(8:0_10:0_18:3)     | 632.5016 | +NH <sub>4</sub> |
| TG(8:0_18:1_18:2)     | 744.6268 | +NH <sub>4</sub> |
| TG(8:0_18:1_18:3)     | 742.6111 | +NH <sub>4</sub> |
| TG(8:0_8:0_8:0)       | 470.3607 | +NH <sub>4</sub> |
| TG(9:0_18:1_18:2)     | 758.6424 | +NH <sub>4</sub> |
| TG(9:0_9:0_10:0)      | 526.4233 | +NH <sub>4</sub> |
| TG(18:1+O_14:0_16:0)  | 820.7156 | +NH <sub>4</sub> |
| TG(18:1+O_14:0_18:0)  | 848.7469 | +NH <sub>4</sub> |
| TG(18:1+O_14:0_18:1)  | 846.7313 | +NH <sub>4</sub> |
| TG(18:1+O_16:0_16:0)  | 848.7469 | +NH <sub>4</sub> |
| TG(18:1+O_16:0_18:0)  | 876.7782 | +NH <sub>4</sub> |
| TG(18:1+O_16:0_18:1)  | 874.7626 | +NH <sub>4</sub> |
| TG(18:1+O_18:0_18:0)  | 904.8095 | +NH <sub>4</sub> |
| TG(18:1+O_18:0_18:1)  | 902.7939 | +NH <sub>4</sub> |
| TG(18:1+O_18:1_18:1)  | 900.7782 | +NH <sub>4</sub> |
| TG(18:2+O_16:0_16:0)  | 846.7313 | +NH <sub>4</sub> |
| TG(18:2+O_16:0_18:0)  | 874.7626 | +NH <sub>4</sub> |
| TG(18:2+O_16:0_18:1)  | 872.7469 | +NH <sub>4</sub> |
| TG(18:2+O_18:0_18:1)  | 900.7782 | +NH <sub>4</sub> |
| TG(18:2+OO_15:0_16:0) | 848.7105 | +Na              |
| TG(18:2+OO_16:0_17:0) | 876.7418 | +Na              |
| TG(18:2+OO_16:0_17:1) | 874.7262 | +Na              |
| TG(18:2+OO_16:0_19:0) | 904.7731 | +Na              |
| TG(18:2+OO_16:0_21:0) | 932.8044 | +Na              |
| TG(18:2+OO_16:0_21:1) | 930.7888 | +Na              |
| TG(18:2+OO_17:0_18:3) | 898.7262 | +H               |
| TG(18:2+OO_17:1_18:3) | 896.7105 | +H               |
| TG(18:2+OO_18:3_19:0) | 926.7575 | +H               |
| TG(18:2+OO_18:3_21:0) | 954.7888 | +H               |
| TG(18:2+OO_18:3_21:1) | 952.7731 | +H               |
| DG(10:0_12:0)         | 428.3502 | +Na              |
| DG(10:0_14:0)         | 456.3815 | +Na              |
| DG(10:0_14:1)         | 454.3658 | +Na              |
| DG(10:0_18:1)         | 510.4284 | +Na              |
| DG(10:0_18:2)         | 508.4128 | +NH <sub>4</sub> |
| DG(10:0_18:3)         | 506.3971 | +NH <sub>4</sub> |
| DG(12:0_14:0)         | 484.4128 | +Na              |
| DG(12:0_18:2)         | 536.4441 | +NH <sub>4</sub> |
| DG(14:0_18:2)         | 564.4754 | +NH <sub>4</sub> |

|                     |          |                  |
|---------------------|----------|------------------|
| DG(14:0_18:3)       | 562.4597 | +NH <sub>4</sub> |
| DG(16:0_10:0)       | 484.4128 | +Na              |
| DG(16:0_12:0)       | 512.4441 | +Na              |
| DG(16:0_14:0)       | 540.4754 | +Na              |
| DG(16:0_14:1)       | 538.4597 | +NH <sub>4</sub> |
| DG(16:0_16:0)       | 568.5067 | +Na              |
| DG(16:0_18:1)       | 594.5223 | +NH <sub>4</sub> |
| DG(16:0_18:2)       | 592.5067 | +NH <sub>4</sub> |
| DG(16:0_6:0)        | 428.3502 | +Na              |
| DG(16:0_8:0)        | 456.3815 | +Na              |
| DG(16:1_18:1)       | 592.5067 | +NH <sub>4</sub> |
| DG(18:0_16:0)       | 596.538  | +NH <sub>4</sub> |
| DG(18:0_18:0)       | 624.5693 | +NH <sub>4</sub> |
| DG(18:0_18:1)       | 622.5536 | +NH <sub>4</sub> |
| DG(18:0_18:2)       | 620.538  | +NH <sub>4</sub> |
| DG(18:1_14:0)       | 566.491  | +Na              |
| DG(18:1_18:1)       | 620.538  | +NH <sub>4</sub> |
| DG(18:1_18:2)       | 618.5223 | +NH <sub>4</sub> |
| DG(18:1_18:3)       | 616.5067 | +NH <sub>4</sub> |
| DG(4:0_14:0)        | 372.2876 | +NH <sub>4</sub> |
| DG(4:0_16:0)        | 400.3189 | +NH <sub>4</sub> |
| DG(4:0_18:0)        | 428.3502 | +NH <sub>4</sub> |
| DG(4:0_18:1)        | 426.3345 | +Na              |
| DG(4:0_18:2)        | 424.3189 | +NH <sub>4</sub> |
| DG(6:0_14:0)        | 400.3189 | +NH <sub>4</sub> |
| DG(6:0_18:1)        | 454.3658 | +Na              |
| DG(6:0_18:2)        | 452.3502 | +NH <sub>4</sub> |
| DG(8:0_14:0)        | 428.3502 | +NH <sub>4</sub> |
| DG(8:0_18:1)        | 482.3971 | +Na              |
| DG(8:0_18:2)        | 480.3815 | +NH <sub>4</sub> |
| DG(18:2+OO_9:0)     | 526.387  | +NH <sub>4</sub> |
| Cer(d16:1_22:0)     | 593.5747 | +HCOO            |
| Cer(d16:1_23:0)     | 607.5903 | +HCOO            |
| Cer(d16:1_24:0)     | 621.606  | +HCOO            |
| Cer(d18:1_16:0)     | 537.5121 | +HCOO            |
| Cer(d18:1_23:0)     | 635.6216 | +HCOO            |
| Cer(d18:1_24:0)     | 649.6373 | +HCOO            |
| Hex1Cer(d18:1_16:0) | 699.5649 | +HCOO            |
| Hex1Cer(d18:1_22:0) | 783.6588 | +HCOO            |
| Hex1Cer(d18:1_23:0) | 797.6745 | +HCOO            |
| Hex1Cer(d18:1_24:0) | 811.6901 | +HCOO            |
| Hex2Cer(d18:1_22:0) | 945.7116 | +HCOO            |
| Hex2Cer(d18:1_23:0) | 959.7273 | +HCOO            |
| Hex2Cer(d18:1_24:0) | 973.7429 | +HCOO            |
| LPC(12:0)           | 439.2699 | +H               |

|               |          |       |
|---------------|----------|-------|
| LPC(14:0)     | 467.3012 | +H    |
| LPC(15:0)     | 481.3168 | +H    |
| LPC(16:0)     | 495.3325 | +H    |
| LPC(16:1)     | 493.3168 | +H    |
| LPC(18:0)     | 523.3638 | +H    |
| LPC(18:1)     | 521.3481 | +H    |
| LPC(18:2)     | 519.3325 | +H    |
| LPE(16:0)     | 453.2855 | -H    |
| LPE(18:0)     | 481.3168 | -H    |
| LPE(18:1)     | 479.3012 | -H    |
| LPE(18:2)     | 477.2855 | -H    |
| LPI(18:0)     | 600.3275 | -H    |
| LPS(18:0)     | 525.3067 | -H    |
| LPS(18:1)     | 523.291  | -H    |
| PC(16:0_14:0) | 705.5309 | +HCOO |
| PC(16:0_16:0) | 733.5622 | +HCOO |
| PC(16:0_18:1) | 759.5778 | +HCOO |
| PC(16:0_18:2) | 757.5622 | +HCOO |
| PC(18:0_18:1) | 787.6091 | +HCOO |
| PC(18:1_18:1) | 785.5935 | +HCOO |
| PC(28:0)      | 677.4996 | +H    |
| PC(32:1)      | 731.5465 | +H    |
| PC(36:3)      | 783.5778 | +H    |
| PE(16:0_16:1) | 689.4996 | +H    |
| PE(16:0_18:1) | 717.5309 | +H    |
| PE(16:0_18:2) | 715.5152 | +H    |
| PE(16:1_18:1) | 715.5152 | +H    |
| PE(18:0_18:1) | 745.5622 | +H    |
| PE(18:0_18:2) | 743.5465 | +H    |
| PE(18:1_18:1) | 743.5465 | +H    |
| PE(18:1_18:2) | 741.5309 | +H    |
| PI(16:0_18:1) | 836.5415 | -H    |
| PI(18:0_18:1) | 864.5728 | -H    |
| PI(18:0_18:2) | 862.5571 | -H    |
| PI(18:0_20:4) | 886.5571 | -H    |
| PI(18:1_18:1) | 862.5571 | -H    |
| PS(18:0_18:1) | 789.552  | -H    |
| PS(18:0_18:2) | 787.5363 | -H    |
| PS(38:4)      | 811.5363 | -H    |
| SM(d32:1)     | 674.5363 | +HCOO |
| SM(d34:1)     | 702.5676 | +HCOO |
| SM(d38:1)     | 758.6302 | +HCOO |
| SM(d39:0)     | 774.6615 | +HCOO |
| SM(d39:1)     | 772.6458 | +HCOO |
| SM(d40:1)     | 786.6615 | +HCOO |

|                    |          |                     |
|--------------------|----------|---------------------|
| SM(d41:1)          | 800.6771 | +HCOO               |
| SM(d42:1)          | 814.6928 | +HCOO               |
| BisMePA(16:0_14:0) | 648.473  | +Na                 |
| ChE                | 386.3549 | +H-H <sub>2</sub> O |

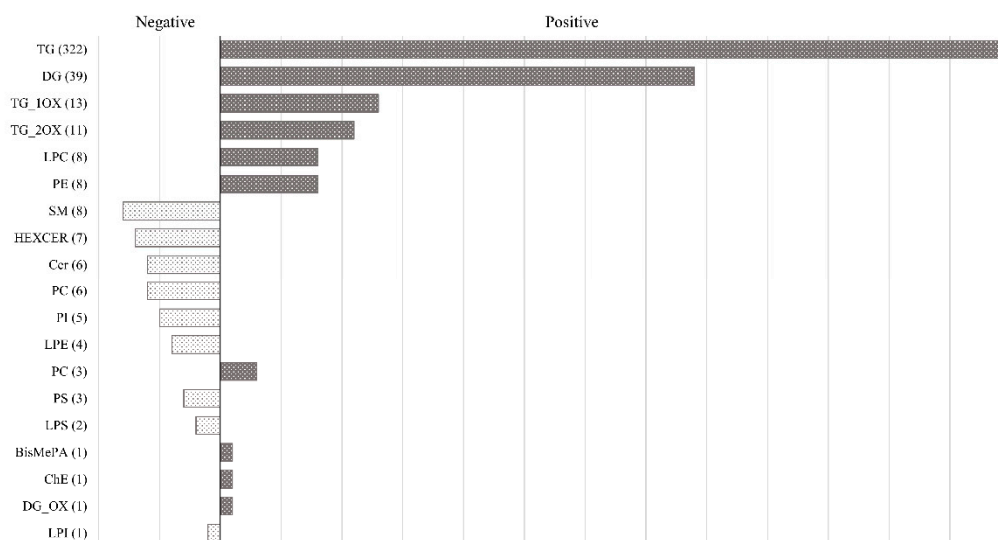

**Figure S1.** Qualitative lipid fingerprint of mozzarella samples with the number of lipids related to each lipid subclass. Lipids were identified in positive and negative acquisition modes. For better graphical visualization, TG line is shown as 322/5.

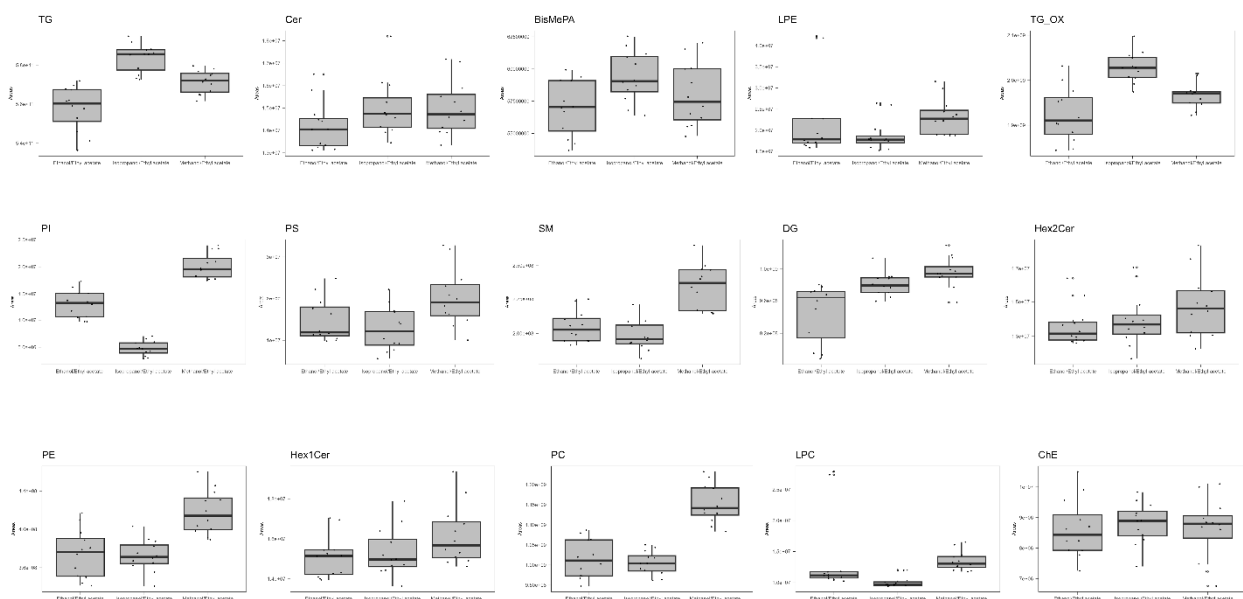

**Figure S2.** Box Plots of lipid subclass areas related to solvent mixtures.

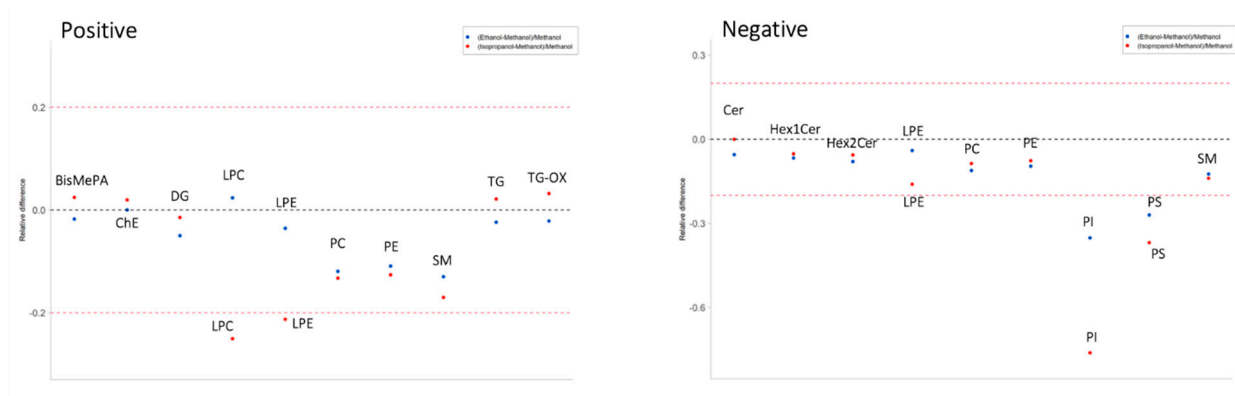

**Figure S3.** Relative differences of extraction capability of lipid subclasses using, ethanol/ethyl acetate (blue) and isopropanol/ethyl acetate (red) compared to methanol/ethyl acetate.
